# Supplementary material
Source: HighWire-hosted journal article supplement (https://bmjopen.bmj.com/content/12/5/e056426)
Supplement: inline-supplementary-material-1 [file inline-supplementary-material-1.pdf]

## Additional file 1. 166 Indicators included for each general domain and speciality domain

| Domain                                | Indicator                                                   | 1 – considered available             | 0 – considered unavailable                                                                     |
|---------------------------------------|-------------------------------------------------------------|--------------------------------------|------------------------------------------------------------------------------------------------|
| <b>Human resources for health (6)</b> | At least five medical specialists                           | - 5 or more specialists              | - Less than 5 specialists                                                                      |
|                                       | At least one surgeon                                        | - 1 or more                          | - Less than 1                                                                                  |
|                                       | At least one internist                                      | - 1 or more                          | - Less than 1                                                                                  |
|                                       | At least one paediatrician                                  | - 1 or more                          | - Less than 1                                                                                  |
|                                       | At least one obstetrician-gynaecologist                     | - 1 or more                          | - Less than 1                                                                                  |
| At least one anaesthesiologist        | - 1 or more                                                 | - Less than 1                        |                                                                                                |
| <b>Lab test (31)</b>                  | HIV rapid test                                              | - Observed, at least one not expired | - Not observed, reported available but not seen<br>- Not observed, never available             |
|                                       | Syphilis rapid test                                         | - Observed, at least one not expired | - Not observed, reported available but not seen<br>- Not observed, never available             |
|                                       | Urine rapid test for pregnancy                              | - Observed, at least one not expired | - Not observed, reported available but not seen<br>- Not observed, never available             |
|                                       | Urine dipstick 3                                            | - Observed, at least one not expired | - Not observed, reported available but not seen<br>- Not observed, never available             |
|                                       | Haemoglobin A1c rapid test                                  | - Observed, at least one not expired | - Not observed, reported available but not seen<br>- Not observed, never available             |
|                                       | Colorimeter or haemoglobinometer                            | - Observed, functional/valid         | - Reported (not seen), functional/valid<br>- Not available today                               |
|                                       | Glucometer                                                  | - Observed, functional/valid         | - Reported (not seen), functional/valid<br>- Not available today                               |
|                                       | Glucometer test strips/discs                                | - Observed, functional/valid         | - Reported (not seen), functional/valid<br>- Not available today                               |
|                                       | Any blood chemistry test                                    | - Yes, onsite                        | - No, never available                                                                          |
|                                       | Renal function test                                         | - Yes, observed, functional/valid    | - No, not available today                                                                      |
|                                       | Other tests for bilirubin                                   | - Yes, onsite                        | - Yes, offsite (specimen sent)<br>- No, never available                                        |
|                                       | ABO blood grouping testing                                  | - Yes, onsite                        | - Yes, offsite (specimen sent)<br>- No, never available                                        |
|                                       | Rhesus blood grouping testing                               | - Yes, onsite                        | - Yes, offsite (specimen sent)<br>- No, never available                                        |
|                                       | Cross-match testing                                         | - Yes, onsite                        | - Yes, offsite (specimen sent)<br>- No, not available today                                    |
|                                       | Onsite PCR for HIV viral load or HIV early-infant diagnosis | - Yes, onsite                        | - Yes, offsite (specimen sent)<br>- Yes, not functional/not valid<br>- No, not available today |
|                                       | Xpert MTB/RIF rapid diagnostic testing for TB               | - Yes, onsite                        | - Yes, offsite (specimen sent)<br>- No, not available today                                    |
|                                       | Urine microscopy                                            | - Yes, observed, functional/valid    | - No, not available today                                                                      |
|                                       | Malaria smears                                              | - Yes, observed, functional/valid    | - No, not available today                                                                      |
|                                       | Microscopy test CSF body fluid counts                       | - Yes, onsite                        | - Yes, offsite (specimen sent)<br>- No, never available                                        |
|                                       | Cryptococcal antigen testing                                | - Yes, onsite                        | - Yes, offsite (specimen sent)<br>- No, never available                                        |
|                                       | Gram stain testing                                          | - Yes, onsite                        | - Yes, offsite (specimen sent)<br>- No, never available                                        |
|                                       | Culture and sensitivity test                                | - Yes, onsite                        | - Yes, offsite (specimen sent)<br>- No, never available                                        |
|                                       | Blood cultures test                                         | - Yes, onsite                        | - Yes, offsite (specimen sent)<br>- No, never available                                        |
|                                       | Fine needle aspiration cytology                             | - Perform in facility                | - Refer for test<br>- Not used                                                                 |
|                                       | Core needle biopsy of lump specimen                         | - Perform in facility                | - Refer for test<br>- Not used                                                                 |
|                                       | Prostate Specific Antigen (PSA) Testing                     | - Perform in facility                | - Refer for test<br>- Not used                                                                 |
| Blood gas measurement                 | - Yes, onsite                                               | - Yes, offsite (specimen sent)       |                                                                                                |

|                                            |                                                                                                              |                                                                                                                                               |                                                                                                                                                                      |
|--------------------------------------------|--------------------------------------------------------------------------------------------------------------|-----------------------------------------------------------------------------------------------------------------------------------------------|----------------------------------------------------------------------------------------------------------------------------------------------------------------------|
|                                            | Cardiac marker (CK, Troponin) test                                                                           | - Yes, onsite                                                                                                                                 | - No, never available<br>- Yes, offsite (specimen sent)<br>- No, never available                                                                                     |
|                                            | PAP smear read in facility                                                                                   | - Yes, read in facility                                                                                                                       | - Yes, read outside facility<br>- No<br>- 0 PAP smears were conducted with results recorded during the past 12 completed months                                      |
|                                            | VIA/VILLI read in facility                                                                                   | - Yes, read in facility                                                                                                                       | - Yes, read outside facility<br>- No<br>- 0 VIA/VILLI were conducted with results recorded during the past 12 completed months                                       |
|                                            | Prepare and examine tissues or samples for cancer                                                            | - Yes                                                                                                                                         | - No                                                                                                                                                                 |
| <b>Oxygen and respiratory support (10)</b> | Surgery oxygen equipment functioning - Oxygen tank/cylinder with attached pressure gauge, pressure regulator | - Yes                                                                                                                                         | - No<br>- Don't know                                                                                                                                                 |
|                                            | Maternity paediatric-sized oxygen delivery apparatus functioning                                             | - Yes                                                                                                                                         | - No                                                                                                                                                                 |
|                                            | Outpatient pulse oximeter functioning                                                                        | - Yes                                                                                                                                         | - No                                                                                                                                                                 |
|                                            | Maternity pulse oximeter functioning                                                                         | - Yes                                                                                                                                         | - No                                                                                                                                                                 |
|                                            | Paediatrics/neonatal oxygen functioning                                                                      | - Yes                                                                                                                                         | - No                                                                                                                                                                 |
|                                            | Emergency pulse oximeter functioning                                                                         | - Yes                                                                                                                                         | - No                                                                                                                                                                 |
|                                            | Ventilator available                                                                                         | - Yes, available now                                                                                                                          | - No                                                                                                                                                                 |
|                                            | Chest tubes available                                                                                        | - Observed, at least one not expired                                                                                                          | - Not observed, not available today<br>- Not observed, never available                                                                                               |
|                                            | Adult CPAP equipment available                                                                               | - Observed, at least one not expired                                                                                                          | - Observed, available but expired<br>- Not observed, reported available but not seen today<br>- Not observed, not available today<br>- Not observed, never available |
|                                            | Emergency paediatrics and neonatal CPAP available                                                            | - Observed                                                                                                                                    | - Reported, not seen<br>- Not available                                                                                                                              |
| <b>General equipment (8)</b>               | ECG offered                                                                                                  | - Yes                                                                                                                                         | - No                                                                                                                                                                 |
|                                            | ECG equipment functioning                                                                                    | - Yes equipment available and functioning                                                                                                     | - No equipment not available or not functioning                                                                                                                      |
|                                            | Ultrasound offered                                                                                           | - Yes                                                                                                                                         | - No                                                                                                                                                                 |
|                                            | Ultrasound equipment functioning                                                                             | - Yes equipment available and functioning                                                                                                     | - No equipment not available or not functioning                                                                                                                      |
|                                            | X-ray offered                                                                                                | - Yes                                                                                                                                         | - No                                                                                                                                                                 |
|                                            | X-ray equipment functioning                                                                                  | - Yes equipment available and functioning                                                                                                     | - No equipment not available or not functioning                                                                                                                      |
|                                            | CT scan offered                                                                                              | - Yes                                                                                                                                         | - No                                                                                                                                                                 |
| CT scan equipment functioning              | - Yes equipment available and functioning                                                                    | - No equipment not available or not functioning                                                                                               |                                                                                                                                                                      |
| <b>24 7 (8)</b>                            | Emergency service with structured triage tool 24/7                                                           | - 24-hour emergency service                                                                                                                   | - 10 hours<br>- No structured triage tool                                                                                                                            |
|                                            | Medical officer onsite or oncall in facility 24/7                                                            | - MO or Emergency practitioner always available, onsite<br>- MO or Emergency practitioner always available, not onsite but oncall in facility | - MO or Emergency practitioner always available, not in facility<br>- Staff not available 24 hours                                                                   |
|                                            | Formal triage tool used 24/7                                                                                 | - Yes                                                                                                                                         | - No                                                                                                                                                                 |
|                                            | Emergency surgery and anaesthesia 24/7                                                                       | - 24-hour emergency service                                                                                                                   | - 0, 2 or 8 hours                                                                                                                                                    |
|                                            | Emergency radiology 24/7                                                                                     | - 24-hour emergency service                                                                                                                   | - 0, 5, 9, 10, 12 hours                                                                                                                                              |
|                                            | Emergency diagnostics 24/7                                                                                   | - 24-hour emergency service                                                                                                                   | - 0, 7, 10, 12 hours                                                                                                                                                 |
|                                            | Emergency pharmacy 24/7                                                                                      | - 24-hour emergency service                                                                                                                   | - 8, 9, 10, 12, 15 hours<br>- No dedicated pharmacy in facility                                                                                                      |
|                                            | Blood transfusion                                                                                            | - Yes available now                                                                                                                           | - No                                                                                                                                                                 |
| <b>IPC (9)</b>                             | Facility has IPC guideline                                                                                   | - Yes, observed                                                                                                                               | - Reported not seen<br>- No                                                                                                                                          |
|                                            | Technical IPC committee                                                                                      | - Yes                                                                                                                                         | - No                                                                                                                                                                 |
|                                            | Dedicated (full-time) IPC staff                                                                              | - Yes                                                                                                                                         | - No                                                                                                                                                                 |

|                                             |                                                                                                                         |                                                   |                                                                  |
|---------------------------------------------|-------------------------------------------------------------------------------------------------------------------------|---------------------------------------------------|------------------------------------------------------------------|
|                                             | Guidelines for cleaning                                                                                                 | - Yes, observed                                   | - Reported not seen<br>- No                                      |
|                                             | Step-by-step techniques for specific tasks                                                                              | - Yes                                             | - No                                                             |
|                                             | Cleaning roster or schedule specifying responsibility                                                                   | - Yes                                             | - No                                                             |
|                                             | Cleaning beds observed                                                                                                  | - Yes                                             | - No                                                             |
|                                             | Cleaning counters/tables observed                                                                                       | - Yes                                             | - No                                                             |
|                                             | Cleaning toilets observed                                                                                               | - Yes                                             | - No                                                             |
| <b>Quality and safety (24)</b>              | Monthly quality assurance committee meeting                                                                             | - Monthly                                         | - Quarterly<br>- Biannually                                      |
|                                             | Documentation of quality assurance information reviewed                                                                 | - Yes, documentation observed                     | - Yes, documentation reported not seen                           |
|                                             | Ongoing quality improvement using Plan-Do-Check-Study-Act approach                                                      | - Yes, service-specific<br>- Yes, across facility | - No                                                             |
|                                             | Multi-disciplinary quality improvement team                                                                             | - Yes                                             | - No                                                             |
|                                             | Departmental specific work improvement teams                                                                            | - Yes                                             | - No                                                             |
|                                             | Documentation of improvement achieved as a result of quality improvement process                                        | - Yes, documentation observed                     | - Yes, documentation reported not seen<br>- No                   |
|                                             | Kenya Quality Model for Health completed in 2017 or 2018                                                                | - 2017<br>- 2018                                  | - 2014<br>- 2016<br>- Don't know                                 |
|                                             | Formal case reviews carried out at least monthly                                                                        | - At least weekly<br>- At least monthly           | - At least quarterly<br>- No specific timing                     |
|                                             | Death reviews results recorded                                                                                          | - Yes                                             | - No                                                             |
|                                             | Guidelines of events that are considered adverse and required to be reported                                            | - Yes, documentation observed                     | - Yes, documentation reported not seen<br>- No                   |
|                                             | Notes or reports that show evidence of review and plan of action for the reports about adverse events                   | - Yes, documentation observed                     | - Yes, documentation reported not seen<br>- No                   |
|                                             | Written guidelines that define nosocomial infections and the process for reporting                                      | - Yes, observed                                   | - Reported not seen<br>- No                                      |
|                                             | Report or record shows nosocomial infections reported over the past 6 months                                            | - Yes, observed                                   | - Reported not seen<br>- No                                      |
|                                             | Written policies and procedures for identifying and managing drug-use problems                                          | - Yes, observed                                   | - Reported not seen<br>- No                                      |
|                                             | Surgery related mortality and morbidity review meetings at least monthly                                                | - At least weekly<br>- At least monthly           | - At least quarterly<br>- No specific timing<br>- None conducted |
|                                             | Surgery related mortality and morbidity review meeting results recorded                                                 | - Yes, observed                                   | - Reported not seen<br>- No                                      |
|                                             | Written guidelines or instructions for reporting on adverse events related to surgery                                   | - Yes, observed                                   | - Reported not seen<br>- No<br>- Don't know                      |
|                                             | Notes or reports that show evidence of review and plan of action for the surgery reports                                | - Yes, documentation observed                     | - Yes, documentation reported not seen<br>- No                   |
|                                             | Guidelines of postoperative infection definition                                                                        | - Yes, documentation observed                     | - Yes, documentation reported not seen<br>- No                   |
|                                             | Notes or reports that show evidence of review and plan of action for the reports about postoperative infection          | - Yes, documentation observed                     | - Yes, documentation reported not seen<br>- No                   |
|                                             | Indicator on deaths prior to discharge among patients who had a procedure in a surgical theater monitored               | - Yes                                             | - No                                                             |
|                                             | Indicator on deaths prior to discharge among < 15 year old patients who had a procedure in a surgical theater monitored | - Yes                                             | - No                                                             |
|                                             | Indicator on post-operative surgical wound infection numbers monitored                                                  | - Yes                                             | - No                                                             |
|                                             | Facility monitor unplanned and unexpected hospital readmissions for any conditions                                      | - Yes                                             | - No                                                             |
| <b>Surgery equipment and medication (8)</b> | Basic operating table functioning                                                                                       | - Yes                                             | - No                                                             |
|                                             | Overhead operating light functioning                                                                                    | - Yes                                             | - No                                                             |
|                                             | Cardiac monitor functioning                                                                                             | - Yes                                             | - No                                                             |

|                                                                            |                                                                  |                                                                       |                                                                                                                                                                |
|----------------------------------------------------------------------------|------------------------------------------------------------------|-----------------------------------------------------------------------|----------------------------------------------------------------------------------------------------------------------------------------------------------------|
|                                                                            |                                                                  |                                                                       | - Don't know                                                                                                                                                   |
|                                                                            | EKG electrodes functioning                                       | - Yes                                                                 | - No<br>- Don't know                                                                                                                                           |
|                                                                            | Thermometer functioning                                          | - Yes                                                                 | - No<br>- Don't know                                                                                                                                           |
|                                                                            | Blood pressure apparatus functioning                             | - Yes                                                                 | - No                                                                                                                                                           |
|                                                                            | Suction apparatus functioning                                    | - Yes                                                                 | - No                                                                                                                                                           |
|                                                                            | Anaesthesia machine available                                    | - Yes available now                                                   | - No                                                                                                                                                           |
| <b>Surgery service (12)</b>                                                | Wound debridement service available                              | - Yes, outpatient<br>- Yes, inpatient<br>- Yes both out and inpatient | - No                                                                                                                                                           |
|                                                                            | Acute burn management service available                          | - Yes, outpatient<br>- Yes, inpatient<br>- Yes both out and inpatient | - No                                                                                                                                                           |
|                                                                            | Closed repair of fracture service available                      | - Yes, outpatient<br>- Yes, inpatient<br>- Yes both out and inpatient | - No                                                                                                                                                           |
|                                                                            | Closed reduction of dislocated joint service available           | - Yes, outpatient<br>- Yes, inpatient<br>- Yes both out and inpatient | - No                                                                                                                                                           |
|                                                                            | Cricothyroidotomy service available                              | - Yes, outpatient<br>- Yes, inpatient<br>- Yes both out and inpatient | - No                                                                                                                                                           |
|                                                                            | Male circumcision service available                              | - Yes, outpatient<br>- Yes, inpatient<br>- Yes both out and inpatient | - No                                                                                                                                                           |
|                                                                            | Hydrocele reduction service available                            | - Yes, outpatient<br>- Yes, inpatient<br>- Yes both out and inpatient | - No                                                                                                                                                           |
|                                                                            | Biopsy of lymph node or mass service available                   | - Yes, outpatient<br>- Yes, inpatient<br>- Yes both out and inpatient | - No                                                                                                                                                           |
|                                                                            | Appendectomy service available                                   | - Yes, outpatient<br>- Yes, inpatient<br>- Yes both out and inpatient | - No                                                                                                                                                           |
|                                                                            | Hernia repair service available                                  | - Yes, outpatient<br>- Yes, inpatient<br>- Yes both out and inpatient | - No                                                                                                                                                           |
|                                                                            | Open reduction and fixation service available                    | - Yes, outpatient<br>- Yes, inpatient<br>- Yes both out and inpatient | - No                                                                                                                                                           |
|                                                                            | Any procedures using laparotomy service available                | - Yes, outpatient<br>- Yes, inpatient<br>- Yes both out and inpatient | - No                                                                                                                                                           |
| <b>Internal medicine equipment and medication (3)</b>                      | Defibrillator available                                          | - Yes, available now                                                  | - No                                                                                                                                                           |
|                                                                            | Renal dialysis/haemodialysis machine available                   | - Yes, available now                                                  | - Yes, not available now<br>- No                                                                                                                               |
|                                                                            | Lumbar puncture kit available                                    | - Observed, at least one not expired                                  | - Observed, available but expired<br>- Not observed, reported available but not seen<br>- Not observed, not available today<br>- Not observed, never available |
| <b>Internal medicine service (10)</b>                                      | ART prescription and follow-up for U5 children service available | - Yes, ART prescription and clinical follow-up                        | - Yes, ART prescription, no clinical follow-up<br>- Yes, clinical follow-up, no ART prescription                                                               |
|                                                                            | HIV/AIDS care and support service available                      | - Yes                                                                 | - No                                                                                                                                                           |
|                                                                            | Diagnose and/or manage diabetes available                        | - Yes                                                                 | - No                                                                                                                                                           |
|                                                                            | Diagnose and/or manage acute myocardial infarction available     | - Diagnose, treat and patient follow-up                               | - Patient follow-up only<br>- No service/refer suspect case                                                                                                    |
|                                                                            | Diagnose and/or manage chronic respiratory disease available     | - Yes                                                                 | - No                                                                                                                                                           |
|                                                                            | Diagnose and/or manage chronic kidney disease available          | - Yes                                                                 | - No                                                                                                                                                           |
| Screening, diagnosis and/or treatment services for breast cancer available | - Yes                                                            | - No                                                                  |                                                                                                                                                                |

|                                                 |                                                                                              |                                      |                                                                                                                                                                |
|-------------------------------------------------|----------------------------------------------------------------------------------------------|--------------------------------------|----------------------------------------------------------------------------------------------------------------------------------------------------------------|
|                                                 | Screening, diagnosis and/or treatment services for colorectal cancer available               | - Yes                                | - No                                                                                                                                                           |
|                                                 | Screening, diagnosis and/or treatment services for prostate cancer available                 | - Yes                                | - No                                                                                                                                                           |
|                                                 | Palliative care service available                                                            | - Yes                                | - No                                                                                                                                                           |
| <b>Paediatrics equipment and medication (8)</b> | Phototherapy machine available                                                               | - Yes, available now                 | - No                                                                                                                                                           |
|                                                 | Infant incubator available at outpatient                                                     | - Yes, available now                 | - Yes, not available now<br>- No                                                                                                                               |
|                                                 | Bed or location for KMC caregiver overnight                                                  | - Yes, observed                      | - Reported, not seen<br>- No                                                                                                                                   |
|                                                 | Exchange transfusion blood available today                                                   | - Yes                                | - No                                                                                                                                                           |
|                                                 | Incubator available today                                                                    | - Yes                                | - No                                                                                                                                                           |
|                                                 | Radiant warmer available today                                                               | - Yes                                | - No                                                                                                                                                           |
|                                                 | Artificial ventilation available today                                                       | - Yes                                | - No                                                                                                                                                           |
|                                                 | Device for intraosseous access available                                                     | - Observed, at least one not expired | - Observed, available but expired<br>- Not observed, reported available but not seen<br>- Not observed, not available today<br>- Not observed, never available |
| <b>Paediatrics service (3)</b>                  | KMC for premature or LBW used                                                                | - Yes                                | - No                                                                                                                                                           |
|                                                 | Newborn sepsis service available                                                             | - Yes                                | - No                                                                                                                                                           |
|                                                 | Newborn sepsis full antibiotics regimen and follow-up always available                       | - Yes always                         | - Yes sometimes<br>- Never                                                                                                                                     |
| <b>OBGYN equipment and medication (10)</b>      | Blood pressure apparatus functioning                                                         | - Yes                                | - No                                                                                                                                                           |
|                                                 | Infant scale (with 100 gram gradation) functioning                                           | - Yes                                | - Don't know                                                                                                                                                   |
|                                                 | Resuscitation table (with heat source) functioning                                           | - Yes                                | - No                                                                                                                                                           |
|                                                 | Self-inflating bag and mask for resuscitation functioning                                    | - Yes                                | - No                                                                                                                                                           |
|                                                 | Newborn bag and mask size 0 for resuscitation of pre-term babies functioning                 | - Yes                                | - No                                                                                                                                                           |
|                                                 | Newborn bag and mask size 1 for resuscitation of term babies functioning                     | - Yes                                | - No                                                                                                                                                           |
|                                                 | Magnesium sulphate injection available                                                       | - Observed, at least one not expired | - Not observed, not available today                                                                                                                            |
|                                                 | Dexamethasone injection available                                                            | - Observed, at least one not expired | - Not observed, not available today<br>- Not observed, never available                                                                                         |
|                                                 | Misoprostol tablet 200 mcg available                                                         | - Observed, at least one not expired | - Not observed, not available today<br>- Not observed, never available                                                                                         |
|                                                 | Oxytocin injection available                                                                 | - Observed, at least one not expired | - Not observed, not available today<br>- Not observed, never available                                                                                         |
| <b>OBGYN service (10)</b>                       | Active management of third stage labour (AMTSL) service available                            | - Yes                                | - No                                                                                                                                                           |
|                                                 | Monitoring and management of labor using a partograph service available                      | - Yes                                | - No                                                                                                                                                           |
|                                                 | Hygienic cord care service available                                                         | - Yes                                | - No                                                                                                                                                           |
|                                                 | Parenteral administration of antibiotics carried out                                         | - Yes                                | - No                                                                                                                                                           |
|                                                 | Parenteral administration of oxytocin for treatment of postpartum haemorrhage carried out    | - Yes                                | - No                                                                                                                                                           |
|                                                 | Assisted vaginal delivery using manual vacuum extraction (MVE) or forceps carried out        | - Yes                                | - No, service not offered<br>- No, trained staff but no cases                                                                                                  |
|                                                 | Manual removal of placenta carried out                                                       | - Yes                                | - No                                                                                                                                                           |
|                                                 | Removal of retained products of conception using D&C or manual vacuum aspiration carried out | - Yes                                | - No, service not offered                                                                                                                                      |
|                                                 | PMTCT available                                                                              | - Yes                                | - No                                                                                                                                                           |
|                                                 | Treatment of pre-invasive cervical cancer available                                          | - Yes                                | - No                                                                                                                                                           |
| <b>Mental health / neurology (6)</b>            | Any mental/neurological services offered                                                     | - Yes, inpatient only                | - Not offered                                                                                                                                                  |
|                                                 | Mental health inpatient ward available                                                       | - Yes, inpatient only                | - Not offered                                                                                                                                                  |

|  |                                              |                                            |                                                               |
|--|----------------------------------------------|--------------------------------------------|---------------------------------------------------------------|
|  | Neurological health inpatient ward available | - Yes, inpatient only                      | - Not offered                                                 |
|  | Depression diagnosis and follow-up available | - Diagnoses and provides patient follow-up | - Diagnoses only<br>- Provides patient follow-up only<br>- No |
|  | Psychosis diagnosis and follow-up available  | - Diagnoses and provides patient follow-up | - Diagnoses only<br>- Provides patient follow-up only<br>- No |
|  | Epilepsy diagnosis and follow-up available   | - Diagnoses and provides patient follow-up | - Diagnoses only<br>- Provides patient follow-up only<br>- No |
