# Supplementary material
Source: HighWire-hosted journal article supplement (https://bmjopen.bmj.com/content/12/5/e056426)
Supplement: inline-supplementary-material-3 [file inline-supplementary-material-3.pdf]

## Additional file 3. All indicator heatmap by hospital bed number

|                                                             | Level 4 small hospitals (n=23) | Level 4 large hospitals (n=23) | Level 5 & 6 hospitals (n=15) | Total (n=61) |
|-------------------------------------------------------------|--------------------------------|--------------------------------|------------------------------|--------------|
| <b>Human resources for health</b>                           |                                |                                |                              |              |
| At least five medical specialists                           | 39%                            | 44%                            | 67%                          | 48%          |
| At least one surgeon                                        | 96%                            | 96%                            | 100%                         | 97%          |
| At least one internist                                      | 48%                            | 57%                            | 73%                          | 57%          |
| At least one paediatrician                                  | 70%                            | 91%                            | 100%                         | 85%          |
| At least one obstetrician-gynaecologist                     | 87%                            | 91%                            | 100%                         | 92%          |
| At least one anaesthesiologist                              | 44%                            | 26%                            | 93%                          | 49%          |
| <b>Lab tests</b>                                            |                                |                                |                              |              |
| <i>Rapid test</i>                                           |                                |                                |                              |              |
| HIV rapid test                                              | 87%                            | 91%                            | 87%                          | 89%          |
| Syphilis rapid test                                         | 96%                            | 91%                            | 100%                         | 95%          |
| Urine rapid test for pregnancy                              | 100%                           | 91%                            | 100%                         | 97%          |
| Urine dipstick 3                                            | 35%                            | 44%                            | 53%                          | 43%          |
| Haemoglobin A1c rapid test                                  | 57%                            | 57%                            | 87%                          | 64%          |
| Colorimeter or haemoglobinometer                            | 70%                            | 61%                            | 67%                          | 66%          |
| Glucometer                                                  | 96%                            | 96%                            | 93%                          | 95%          |
| Glucometer test strips/discs                                | 96%                            | 100%                           | 93%                          | 97%          |
| <i>Basic lab test</i>                                       |                                |                                |                              |              |
| Any blood chemistry test                                    | 83%                            | 78%                            | 93%                          | 84%          |
| Renal function test                                         | 70%                            | 74%                            | 93%                          | 77%          |
| Other tests for bilirubin                                   | 65%                            | 70%                            | 67%                          | 67%          |
| ABO blood grouping testing                                  | 83%                            | 74%                            | 80%                          | 79%          |
| Rhesus blood grouping testing                               | 83%                            | 74%                            | 87%                          | 80%          |
| Cross-match testing                                         | 57%                            | 70%                            | 80%                          | 67%          |
| <i>Infectious disease test</i>                              |                                |                                |                              |              |
| Onsite PCR for HIV viral load or HIV early-infant diagnosis | 0%                             | 4%                             | 27%                          | 8%           |
| Xpert MTB/RIF rapid diagnostic testing for TB               | 61%                            | 83%                            | 87%                          | 75%          |
| Urine microscopy                                            | 91%                            | 83%                            | 93%                          | 89%          |
| Malaria smears                                              | 91%                            | 83%                            | 93%                          | 89%          |
| Microscopy test CSF body fluid counts                       | 83%                            | 78%                            | 93%                          | 84%          |
| Cryptococcal antigen testing                                | 74%                            | 78%                            | 80%                          | 77%          |
| Gram stain testing                                          | 91%                            | 78%                            | 93%                          | 87%          |
| Culture and sensitivity test                                | 57%                            | 74%                            | 87%                          | 71%          |
| Blood cultures test                                         | 17%                            | 22%                            | 80%                          | 34%          |
| <i>Advanced lab test</i>                                    |                                |                                |                              |              |
| Fine needle aspiration cytology                             | 22%                            | 44%                            | 67%                          | 41%          |
| Core needle biopsy of lump specimen                         | 35%                            | 44%                            | 67%                          | 46%          |
| Prostate Specific Antigen (PSA) Testing                     | 48%                            | 61%                            | 80%                          | 61%          |
| Blood gas measurement                                       | 9%                             | 13%                            | 60%                          | 23%          |
| Cardiac marker (CK, Troponin) test                          | 9%                             | 30%                            | 53%                          | 28%          |
| PAP smear read in facility                                  | 17%                            | 13%                            | 33%                          | 20%          |
| VIA/VILLI read in facility                                  | 96%                            | 78%                            | 73%                          | 84%          |
| Prepare and examine tissues or samples for cancer           | 0%                             | 4%                             | 53%                          | 15%          |

**Oxygen and respiratory support**

Surgery oxygen equipment functioning - Oxygen tank/cylinder with attached pressure gauge, pressure regulator

87% 83% 73% 82%

Maternity paediatric-sized oxygen delivery apparatus functioning

87% 74% 93% 84%

Outpatient pulse oximeter functioning

39% 48% 60% 48%

Maternity pulse oximeter functioning

35% 52% 67% 49%

Paediatrics/neonatal oxygen functioning

100% 100% 100% 100%

Emergency pulse oximeter functioning

65% 65% 100% 74%

Ventilator available

52% 52% 87% 61%

Chest tubes available

30% 61% 80% 54%

Adult CPAP equipment available

13% 30% 40% 26%

Emergency paediatrics and neonatal CPAP available

17% 26% 20% 21%

**Equipment**

ECG offered

39% 35% 93% 51%

ECG equipment functioning

26% 35% 87% 44%

Ultrasound offered

83% 91% 100% 90%

Ultrasound equipment functioning

83% 91% 100% 90%

X-ray offered

87% 87% 100% 90%

X-ray equipment functioning

87% 83% 100% 89%

CT scan offered

26% 22% 80% 38%

CT scan equipment functioning

26% 17% 73% 34%

**24 7 availability**

Emergency service 24/7

26% 13% 47% 26%

Medical officer onsite or oncall in facility 24/7

78% 70% 93% 79%

Formal triage tool used 24/7

26% 17% 47% 28%

Emergency surgery and anaesthesia 24/7

17% 13% 40% 21%

Emergency radiology 24/7

91% 87% 100% 92%

Emergency diagnostics 24/7

96% 87% 93% 92%

Emergency pharmacy 24/7

87% 83% 93% 87%

Blood transfusion

91% 83% 100% 90%

**Infection prevention and control**

Facility has IPC guideline

87% 70% 87% 80%

Technical IPC committee

96% 100% 93% 97%

Dedicated (full-time) IPC staff

57% 52% 73% 59%

Guidelines for cleaning

48% 57% 33% 48%

Step-by-step techniques for specific tasks

44% 57% 60% 53%

Cleaning roster or schedule specifying responsibility

48% 61% 73% 59%

Cleaning beds observed

44% 61% 67% 56%

Cleaning counters/tables observed

48% 61% 60% 56%

Cleaning toilets observed

48% 70% 67% 61%

**Quality and safety**

Monthly quality assurance committee meeting

26% 35% 53% 36%

Documentation of quality assurance information reviewed

52% 44% 67% 53%

Ongoing quality improvement using Plan-Do-Check-Study-Act approach

64% 67% 67% 66%

Multi-disciplinary quality improvement team

65% 61% 80% 67%

Departmental specific work improvement teams

65% 61% 80% 67%

Documentation of improvement achieved as a result of quality improvement process

48% 52% 33% 46%

|                                                                                                                         |     |     |      |     |
|-------------------------------------------------------------------------------------------------------------------------|-----|-----|------|-----|
| Kenya Quality Model for Health completed in 2017 or 2018                                                                | 48% | 44% | 60%  | 49% |
| Formal case reviews carried out at least monthly                                                                        | 57% | 57% | 67%  | 59% |
| Death reviews results recorded                                                                                          | 91% | 91% | 100% | 93% |
| Guidelines of events that are considered adverse and required to be reported                                            | 22% | 35% | 33%  | 30% |
| Notes or reports that show evidence of review and plan of action for the reports about adverse events                   | 22% | 39% | 27%  | 30% |
| Written guidelines that define nosocomial infections and the process for reporting                                      | 9%  | 9%  | 40%  | 16% |
| Report or record shows nosocomial infections reported over the past 6 months                                            | 9%  | 4%  | 33%  | 13% |
| Written policies and procedures for identifying and managing drug-use problems                                          | 70% | 65% | 67%  | 67% |
| Surgery related mortality and morbidity review meetings at least monthly                                                | 44% | 39% | 60%  | 46% |
| Surgery related mortality and morbidity review meeting results recorded                                                 | 44% | 57% | 53%  | 51% |
| Written guidelines or instructions for reporting on adverse events related to surgery                                   | 9%  | 26% | 33%  | 21% |
| Notes or reports that show evidence of review and plan of action for the surgery reports                                | 9%  | 17% | 27%  | 16% |
| Guidelines of postoperative infection definition                                                                        | 17% | 26% | 33%  | 25% |
| Notes or reports that show evidence of review and plan of action for the reports about postoperative infection          | 13% | 17% | 13%  | 15% |
| Indicator on deaths prior to discharge among patients who had a procedure in a surgical theater monitored               | 9%  | 22% | 53%  | 25% |
| Indicator on deaths prior to discharge among < 15 year old patients who had a procedure in a surgical theater monitored | 9%  | 17% | 47%  | 21% |
| Indicator on post-operative surgical wound infection numbers monitored                                                  | 9%  | 17% | 40%  | 20% |
| Facility monitor unplanned and unexpected hospital readmissions for any conditions                                      | 30% | 26% | 40%  | 31% |

### Surgery

#### Surgery equipment & medication

|                                      |      |     |      |     |
|--------------------------------------|------|-----|------|-----|
| Basic operating table functioning    | 96%  | 96% | 100% | 97% |
| Overhead operating light functioning | 96%  | 96% | 100% | 97% |
| Cardiac monitor functioning          | 87%  | 83% | 100% | 89% |
| EKG electrodes functioning           | 83%  | 70% | 100% | 82% |
| Thermometer functioning              | 96%  | 87% | 93%  | 92% |
| Blood pressure apparatus functioning | 70%  | 91% | 93%  | 84% |
| Suction apparatus functioning        | 100% | 96% | 100% | 98% |
| Anaesthesia machine available        | 83%  | 74% | 93%  | 82% |

#### Surgery service

|                                                        |      |      |      |      |
|--------------------------------------------------------|------|------|------|------|
| Wound debridement service available                    | 100% | 100% | 100% | 100% |
| Acute burn management service available                | 96%  | 96%  | 100% | 97%  |
| Closed repair of fracture service available            | 96%  | 91%  | 100% | 95%  |
| Closed reduction of dislocated joint service available | 96%  | 91%  | 100% | 95%  |
| Cricothyroidotomy service available                    | 78%  | 57%  | 80%  | 71%  |
| Male circumcision service available                    | 100% | 96%  | 93%  | 97%  |
| Hydrocele reduction service available                  | 100% | 91%  | 93%  | 95%  |
| Biopsy of lymph node or mass service available         | 100% | 100% | 100% | 100% |
| Appendectomy service available                         | 100% | 96%  | 100% | 98%  |
| Hernia repair service available                        | 100% | 96%  | 100% | 98%  |
| Open reduction and fixation service available          | 100% | 83%  | 100% | 93%  |
| Any procedures using laparotomy service available      | 100% | 96%  | 100% | 98%  |

### Internal medicine

**Internal medicine equipment & medication**

|                                                |     |     |     |     |
|------------------------------------------------|-----|-----|-----|-----|
| Defibrillator available                        | 57% | 39% | 73% | 54% |
| Renal dialysis/haemodialysis machine available | 44% | 65% | 93% | 64% |
| Lumbar puncture kit available                  | 22% | 26% | 80% | 38% |

**Internal medicine service**

|                                                                                |      |      |      |      |
|--------------------------------------------------------------------------------|------|------|------|------|
| ART prescription and follow-up for U5 children service available               | 96%  | 96%  | 93%  | 95%  |
| HIV/AIDS care and support service available                                    | 100% | 96%  | 100% | 98%  |
| Diagnose and/or manage diabetes available                                      | 100% | 100% | 100% | 100% |
| Diagnose and/or manage acute myocardial infraction available                   | 83%  | 74%  | 93%  | 82%  |
| Diagnose and/or manage chronic respiratory disease available                   | 100% | 100% | 100% | 100% |
| Diagnose and/or manage chronic kidney disease available                        | 83%  | 91%  | 100% | 90%  |
| Screening, diagnosis and/or treatment services for breast cancer available     | 78%  | 87%  | 93%  | 85%  |
| Screening, diagnosis and/or treatment services for colorectal cancer available | 35%  | 30%  | 60%  | 39%  |
| Screening, diagnosis and/or treatment services for prostate cancer available   | 61%  | 83%  | 87%  | 75%  |
| Palliative care service available                                              | 48%  | 65%  | 100% | 67%  |

**Paediatrics****Paediatrics equipment & medication**

|                                             |     |      |      |     |
|---------------------------------------------|-----|------|------|-----|
| Phototherapy machine available              | 52% | 52%  | 67%  | 56% |
| Infant incubator available                  | 74% | 78%  | 87%  | 79% |
| Bed or location for KMC caregiver overnight | 61% | 70%  | 80%  | 69% |
| Exchange transfusion blood available today  | 26% | 17%  | 60%  | 31% |
| Incubator available today                   | 96% | 100% | 100% | 98% |
| Radiant warmer available today              | 91% | 96%  | 93%  | 93% |
| Artificial ventilation available today      | 48% | 57%  | 73%  | 57% |
| Device for intraosseous access available    | 17% | 30%  | 53%  | 31% |

**Paediatrics service**

|                                                                        |      |     |      |     |
|------------------------------------------------------------------------|------|-----|------|-----|
| KMC for premature or LBW used                                          | 83%  | 87% | 93%  | 87% |
| Newborn sepsis service available                                       | 100% | 96% | 100% | 98% |
| Newborn sepsis full antibiotics regimen and follow-up always available | 91%  | 87% | 87%  | 89% |

**OBGYN****OBGYN equipment & medication**

|                                                                              |      |      |      |     |
|------------------------------------------------------------------------------|------|------|------|-----|
| Blood pressure apparatus functioning                                         | 91%  | 100% | 100% | 97% |
| Infant scale (with 100 gram gradation) functioning                           | 87%  | 96%  | 100% | 93% |
| Resuscitation table (with heat source) functioning                           | 91%  | 100% | 93%  | 95% |
| Self-inflating bag and mask for resuscitation functioning                    | 87%  | 91%  | 80%  | 87% |
| Newborn bag and mask size 0 for resuscitation of pre-term babies functioning | 91%  | 91%  | 87%  | 90% |
| Newborn bag and mask size 1 for resuscitation of term babies functioning     | 96%  | 96%  | 93%  | 95% |
| Magnesium sulphate injection available                                       | 96%  | 96%  | 100% | 97% |
| Dexamethasone injection available                                            | 91%  | 91%  | 73%  | 87% |
| Misoprostol tablet 200 mcg available                                         | 74%  | 70%  | 73%  | 72% |
| Oxytocin injection available                                                 | 100% | 96%  | 100% | 98% |

**OBGYN service**

|                                                                         |      |      |      |      |
|-------------------------------------------------------------------------|------|------|------|------|
| Active management of third stage labour (AMTSL) service available       | 100% | 100% | 100% | 100% |
| Monitoring and management of labor using a partograph service available | 96%  | 96%  | 100% | 97%  |
| Hygienic cord care service available                                    | 100% | 91%  | 93%  | 95%  |

|                                                                                              |      |      |      |      |
|----------------------------------------------------------------------------------------------|------|------|------|------|
| Parenteral administration of antibiotics carried out                                         | 100% | 100% | 100% | 100% |
| Parenteral administration of oxytocic for treatment of postpartum haemorrhage carried out    | 100% | 100% | 100% | 100% |
| Assisted vaginal delivery using manual vacuum extraction (MVE) or forceps carried out        | 57%  | 74%  | 73%  | 67%  |
| Manual removal of placenta carried out                                                       | 100% | 100% | 100% | 100% |
| Removal of retained products of conception using D&C or manual vacuum aspiration carried out | 83%  | 83%  | 100% | 87%  |
| PMTCT available                                                                              | 100% | 100% | 100% | 100% |
| Treatment of pre-invasive cervical cancer available                                          | 44%  | 48%  | 53%  | 48%  |
| <b>Mental health / neurology</b>                                                             |      |      |      |      |
| Any mental/neurological services offered                                                     | 65%  | 96%  | 93%  | 84%  |
| Mental health inpatient ward available                                                       | 26%  | 48%  | 80%  | 48%  |
| Neurological health inpatient ward available                                                 | 13%  | 22%  | 67%  | 30%  |
| Depression diagnosis and follow-up available                                                 | 48%  | 87%  | 87%  | 72%  |
| Psychosis diagnosis and follow-up available                                                  | 52%  | 91%  | 87%  | 75%  |
| Epilepsy diagnosis and follow-up available                                                   | 57%  | 91%  | 87%  | 77%  |
